# Supplementary material for: Effects of Photodynamic Therapy on Tumor Metabolism and Oxygenation Revealed by Fluorescence and Phosphorescence Lifetime Imaging
Source: MDPI journal article supplement (doi:10.3390/ijms25031703), 2024-01-30
Supplement: s1 [file s1]

## Supplementary Material

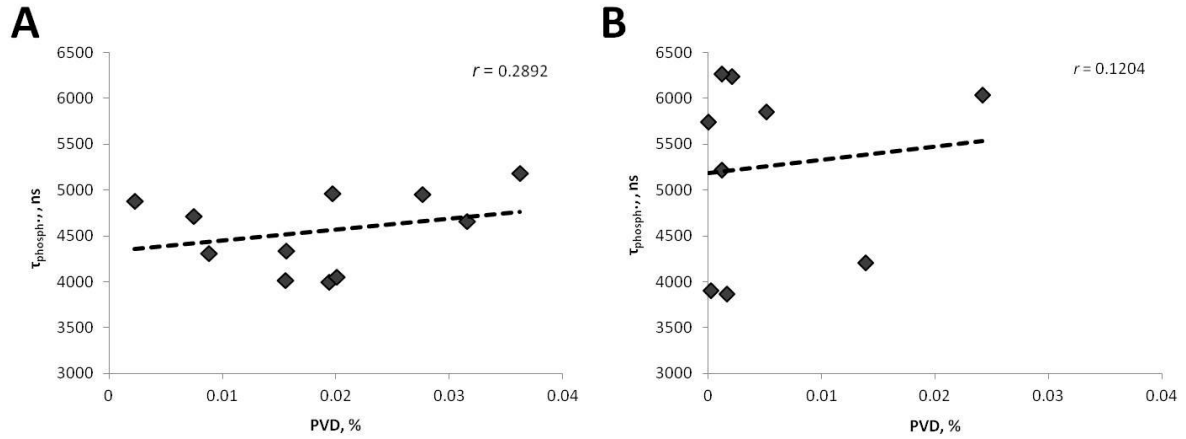

**Figure S1.** Scatterplot of BTPDM1 phosphorescence lifetimes against perfused vessel densities. Dots are the measurements for individual CT26 tumors in untreated (A) or PDT-treated (B) groups. Dashed lines are the linear approximation. Pearson correlation  $r$  is shown on the plots.

**Table S1.** Fluorescence lifetimes of NAD(P)H in the control tumors and tumors after PDT with either Photoditazine (PDZ) or KillerRed. Mean±SD.

|        | $\tau_1$ , ns | $\tau_2$ , ns | $\tau_1$ , ns  | $\tau_2$ , ns |
|--------|---------------|---------------|----------------|---------------|
|        | Control       |               | PDT, PDZ       |               |
| 3 h    | 0.42±0.01     | 2.47±0.24     | 0.41±0.01      | 2.31±0.21     |
| 6 h    | 0.41±0.01     | 2.42±0.15     | 0.42±0.03      | 2.28±0.11     |
| 24 h   | 0.41±0.02     | 2.38±0.22     | 0.43±0.02      | 2.37±0.14     |
| 48 h   | 0.42±0.03     | 2.34±0.24     | 0.41±0.01      | 2.38±0.22     |
| 5 days | 0.41±0.01     | 2.36±0.13     | 0.43±0.03      | 2.31±0.31     |
|        | Control       |               | PDT, KillerRed |               |
| 3 h    | 0.49±0.01     | 2.67±0.18     | 0.51±0.01      | 2.62±0.31     |
| 6 h    | 0.51±0.02     | 2.62±0.23     | 0.48±0.01      | 2.68±0.21     |
| 24 h   | 0.51±0.03     | 2.68±0.37     | 0.53±0.04      | 2.71±0.22     |
| 48 h   | 0.49±0.02     | 2.72±0.24     | 0.49±0.02      | 2.68±0.22     |
| 5 days | 0.47±0.03     | 2.74±0.43     | 0.45±0.01      | 2.72±0.35     |
